# Supplementary material for: Structural flexibility of a copper-based metal–organic framework: sorption of C4-hydrocarbons and in situ XRD
Source: Royal Society of Chemistry journal article supplement (doi:10.1039/c3ta15331b), 2014-01-01
Supplement: c3ta15331b1.pdf [file c3ta15331b1.pdf]

## Electronic Supplementary Information (ESI)

### Structural flexibility of a copper-based metal organic framework: sorption of C<sub>4</sub>-hydrocarbons and *in situ*-XRD

Marcus Lange,<sup>a</sup> Merten Kobalz,<sup>b</sup> Jens Bergmann,<sup>b</sup> Daniel Lässig,<sup>b</sup> Jörg Lincke,<sup>b</sup> Jens Möllmer,<sup>a</sup> Andreas Möller,<sup>a</sup> Jörg Hofmann,<sup>a</sup> Harald Krautscheid,<sup>b</sup> Reiner Staudt<sup>c</sup> and Roger Gläser<sup>a</sup>

<sup>a</sup> *Institut für Nichtklassische Chemie e.V., Permoserstraße 15, D-04318 Leipzig, Germany*

<sup>b</sup> *Universität Leipzig, Fakultät für Chemie und Mineralogie, Johannisallee 29, D-04103 Leipzig, Germany*

<sup>c</sup> *University of Applied Sciences Offenburg, Badstraße 24, D-77652 Offenburg, Germany;*

# Tables

**Table SI 1** Pore volumes of  $\infty^3$  [Cu<sub>4</sub>( $\mu_4$ -O)( $\mu_2$ -OH)<sub>2</sub>(Me<sub>2</sub>trzpbpa)<sub>4</sub>] (1) for N<sub>2</sub>/ 77 K and CO<sub>2</sub> /298 K sorption.

|                          | After 1 <sup>st</sup> pore filling |                                                     | Saturation       |                                                     | Ref.       |
|--------------------------|------------------------------------|-----------------------------------------------------|------------------|-----------------------------------------------------|------------|
|                          | p/p <sub>0</sub>                   | V <sub>pore</sub> / cm <sup>3</sup> g <sup>-1</sup> | p/p <sub>0</sub> | V <sub>pore</sub> / cm <sup>3</sup> g <sup>-1</sup> |            |
| N <sub>2</sub> at 77 K   | 0.001                              | 0.16                                                | 0.90             | 0.58                                                | 1          |
| CO <sub>2</sub> at 298 K | 0.050                              | 0.13                                                | 0.90             | 0.53                                                |            |
| N <sub>2</sub> at 77 K   | 0.030                              | 0.16                                                | 0.60             | 0.59                                                | this study |
| CO <sub>2</sub> at 298 K | 0.001                              | 0.14                                                | 0.68             | 0.54                                                |            |

**Table SI 2** Physical properties including critical temperature (T<sub>C</sub>), critical pressure (p<sub>C</sub>), critical density (ρ<sub>C</sub>), boiling point (T<sub>b</sub>) and density at boiling point (ρ<sub>b</sub>) of carbon dioxide, nitrogen and C<sub>4</sub>-hydrocarbons.

|                                        | CO <sub>2</sub> | N <sub>2</sub> | <i>n</i> -butane | isobutane | 1-butene | isobutene |
|----------------------------------------|-----------------|----------------|------------------|-----------|----------|-----------|
| T <sub>C</sub> / K                     | 304.15          | 126.25         | 425.15           | 408.13    | 419.65   | 417.85    |
| p <sub>C</sub> / MPa                   | 7.38            | 3.40           | 3.80             | 3.65      | 4.02     | 4.00      |
| ρ <sub>C</sub> / (g cm <sup>-3</sup> ) | 0.468           | 0.314          | 0.228            | 0.221     | 0.234    | 0.234     |
| T <sub>b</sub> / K                     | -               | 77.15          | 272.65           | 261.45    | 266.95   | 266.05    |
| ρ <sub>b</sub> / (g cm <sup>-3</sup> ) | -               | 0.809          | 0.601            | 0.594     | 0.626    | 0.626     |

**Table SI 3** Parameters for Langmuir-Fits for different temperatures with fixed N<sub>max</sub> (283 K).

|                                                        | 283 K   | 298 K   | 313 K   | 328 K   | 343 K   |
|--------------------------------------------------------|---------|---------|---------|---------|---------|
| <b><i>n</i>-butane on 1 with fixed N<sub>max</sub></b> |         |         |         |         |         |
| N <sub>max</sub> / mmol g <sup>-1</sup>                | 0.980   |         |         |         |         |
| b / kPa <sup>-1</sup>                                  | 53.981  | 16.867  | 6.307   | 2.759   | 1.282   |
| R <sup>2</sup>                                         | 0.99954 | 0.99915 | 0.99927 | 0.99899 | 0.99902 |
| <b>isobutane on 1 with fixed N<sub>max</sub></b>       |         |         |         |         |         |
| N <sub>max</sub> / mmol g <sup>-1</sup>                | 0.858   |         |         |         |         |
| b / kPa <sup>-1</sup>                                  | 54.111  | 18.294  | 6.585   | 2.887   | 1.428   |
| R <sup>2</sup>                                         | 0.99960 | 0.99985 | 0.99965 | 0.99957 | 0.99982 |
| <b>1-butene on 1 with fixed N<sub>max</sub></b>        |         |         |         |         |         |
| N <sub>max</sub> / mmol g <sup>-1</sup>                | 1.501   |         |         |         |         |
| b / kPa <sup>-1</sup>                                  | 20.449  | 6.380   | 2.214   | 0.976   | 0.562   |
| R <sup>2</sup>                                         | 0.98974 | 0.98993 | 0.99116 | 0.98607 | 0.98716 |
| <b>isobutene on 1 with fixed N<sub>max</sub></b>       |         |         |         |         |         |
| N <sub>max</sub> / mmol g <sup>-1</sup>                | 2.124   |         |         |         |         |
| b / kPa <sup>-1</sup>                                  | 7.415   | 3.267   | 1.377   | 0.598   | 0.305   |
| R <sup>2</sup>                                         | 0.99279 | 0.99904 | 0.99319 | 0.99589 | 0.98845 |

## Figures

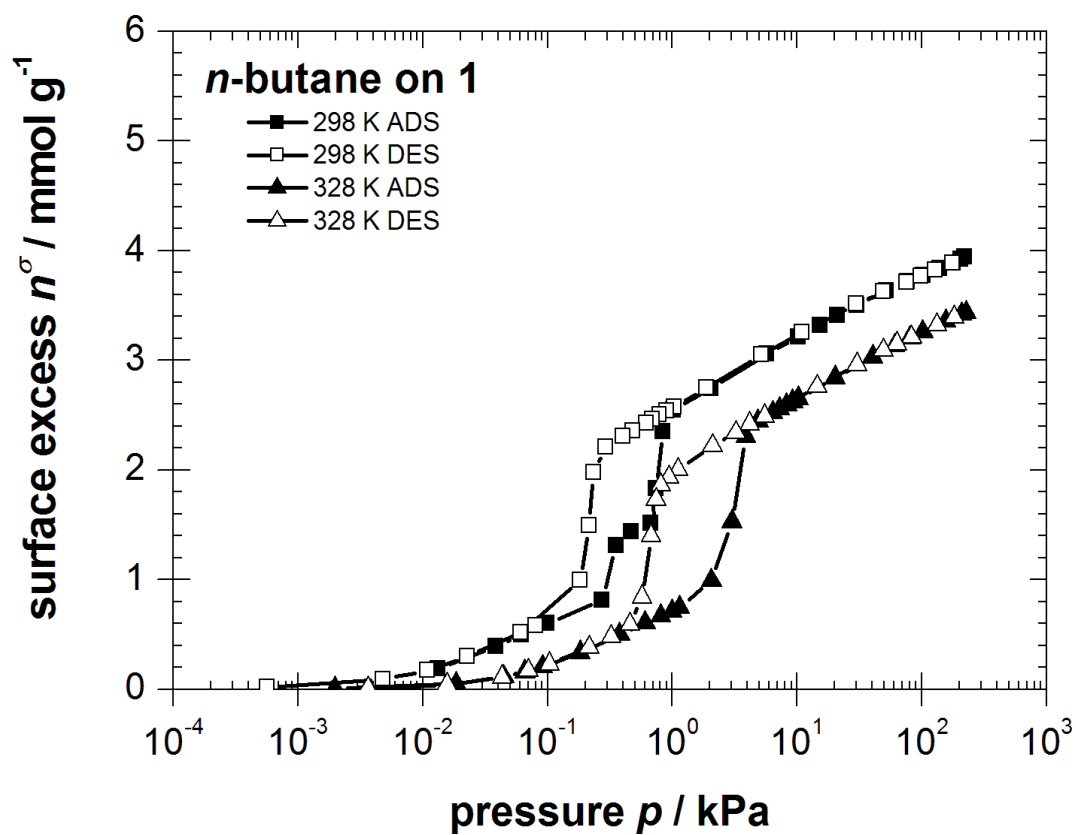

**Fig. SI 1** Surface excess as a function of pressure for the sorption of *n*-butane on **1** at 298 K and 328 K (ADS: adsorption, DES: desorption).

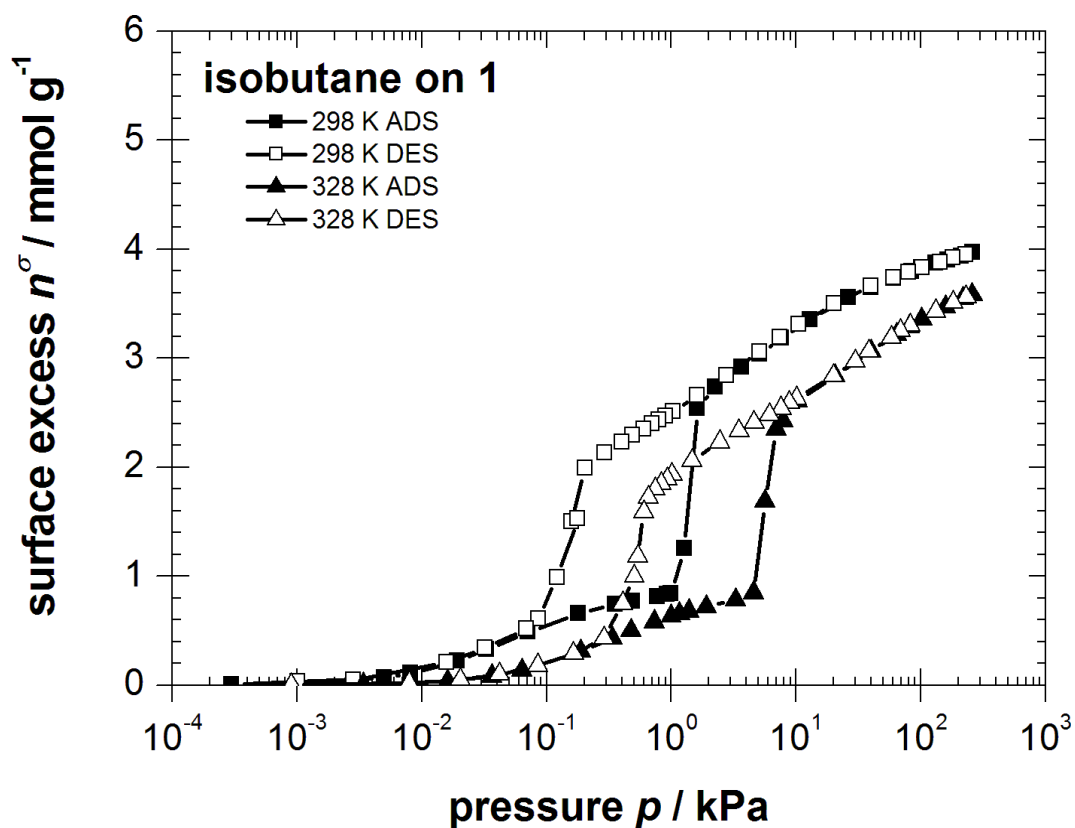

**Fig. SI 2** Surface excess as a function of pressure for the sorption of isobutane on **1** at 298 K and 328 K (ADS: adsorption, DES: desorption).

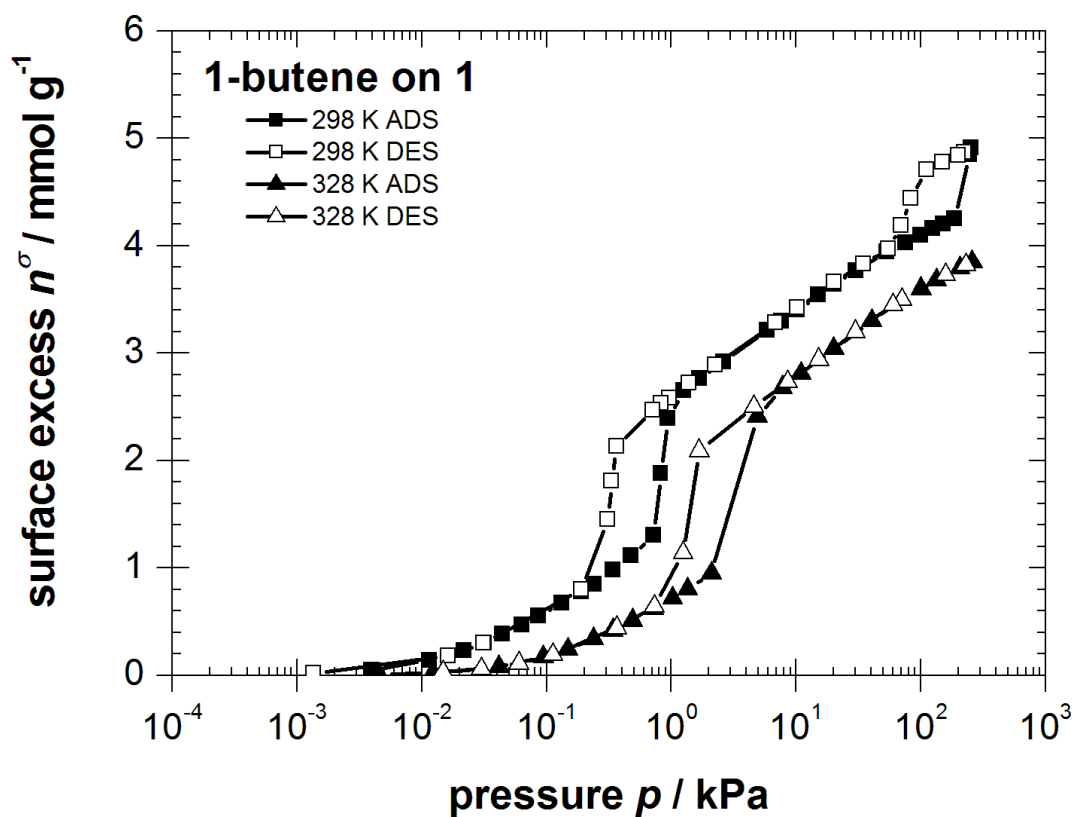

**Fig. SI 3** Surface excess as a function of pressure for the sorption of 1-butene on **1** at 298 K and 328 K (ADS: adsorption, DES: desorption).

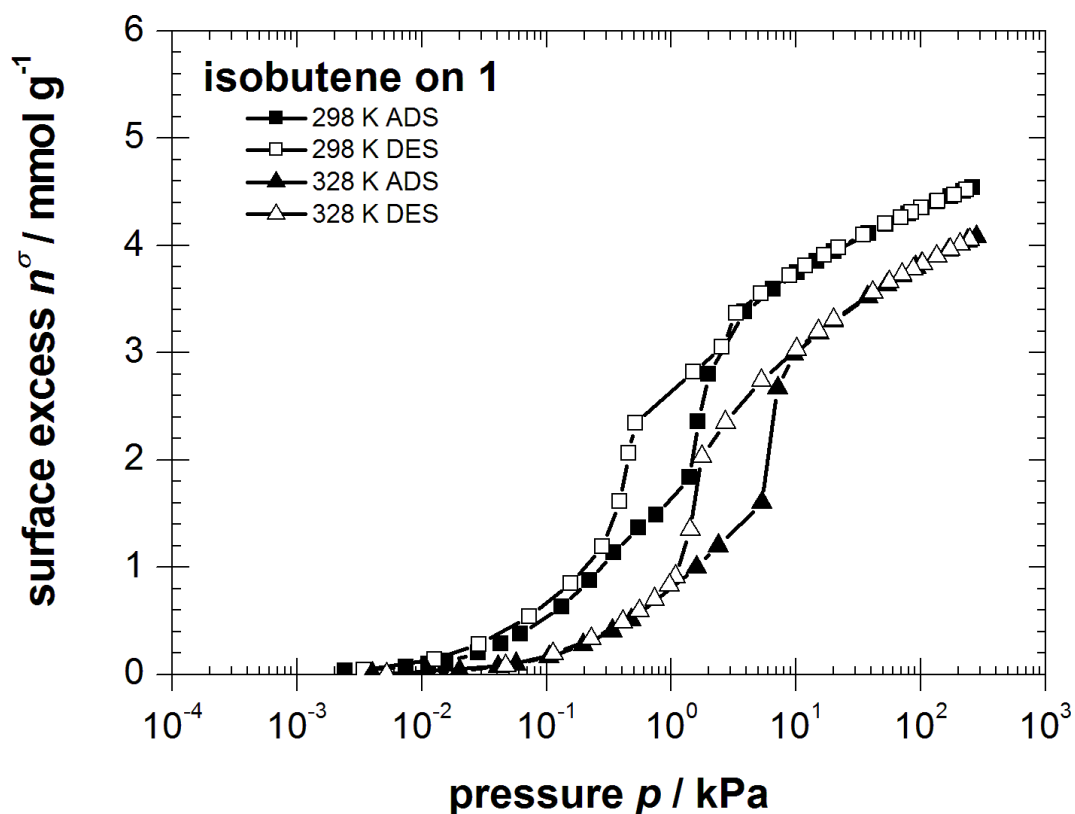

**Fig. SI 4** Surface excess as a function of pressure for the sorption of isobutene on **1** at 298 K and 328 K (ADS: adsorption, DES: desorption).

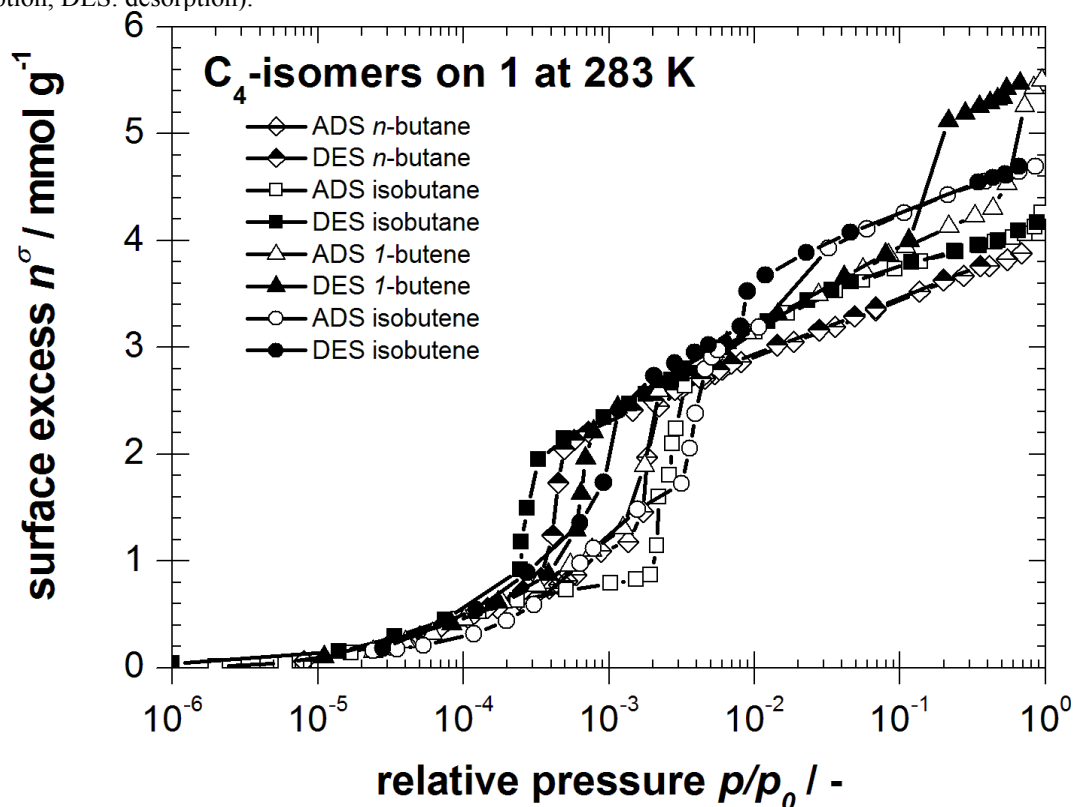

**Fig. SI 5** Adsorption (ADS, open symbols) and desorption (DES, closed symbols) isotherms of investigated C<sub>4</sub>-hydrocarbons, including *n*-butane (diamonds), isobutane (squares), 1-butene (triangles) and isobutene (circles) on **1** at 283 K up to relative pressures  $p/p_0 = 1$ .

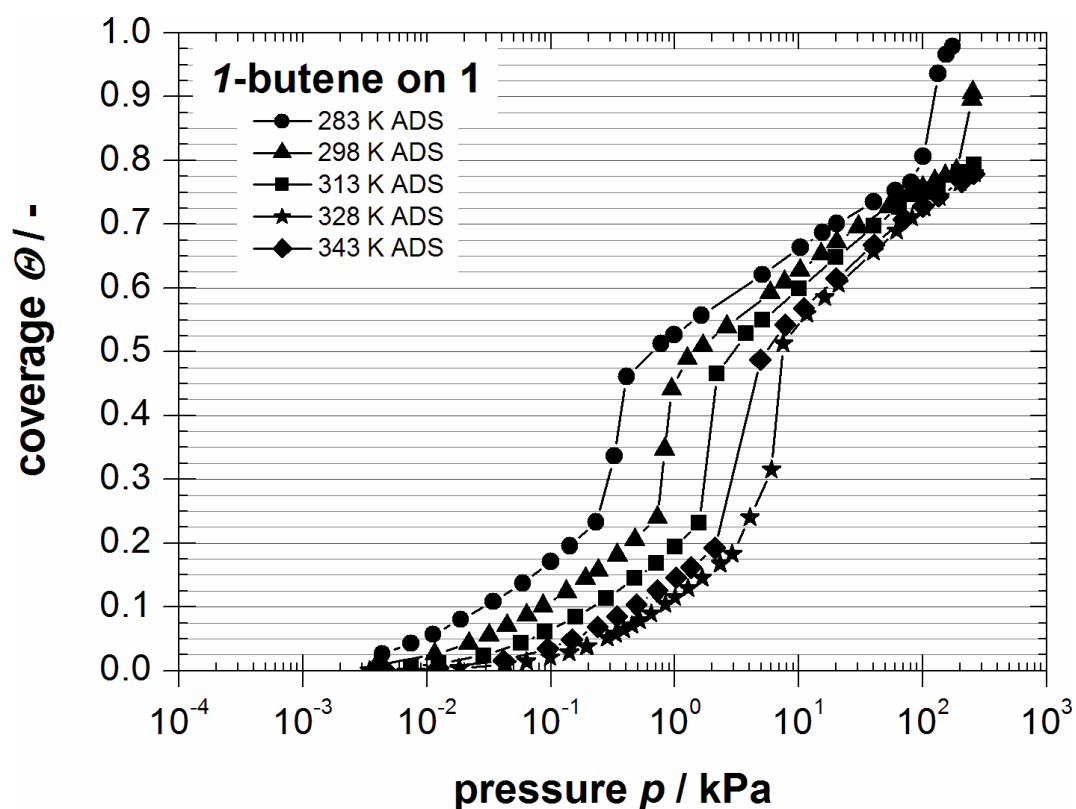

**Fig. SI 6** Coverage of 1-butene on **1** as a function of Pressures for different temperatures. Intermediate values were interpolated.

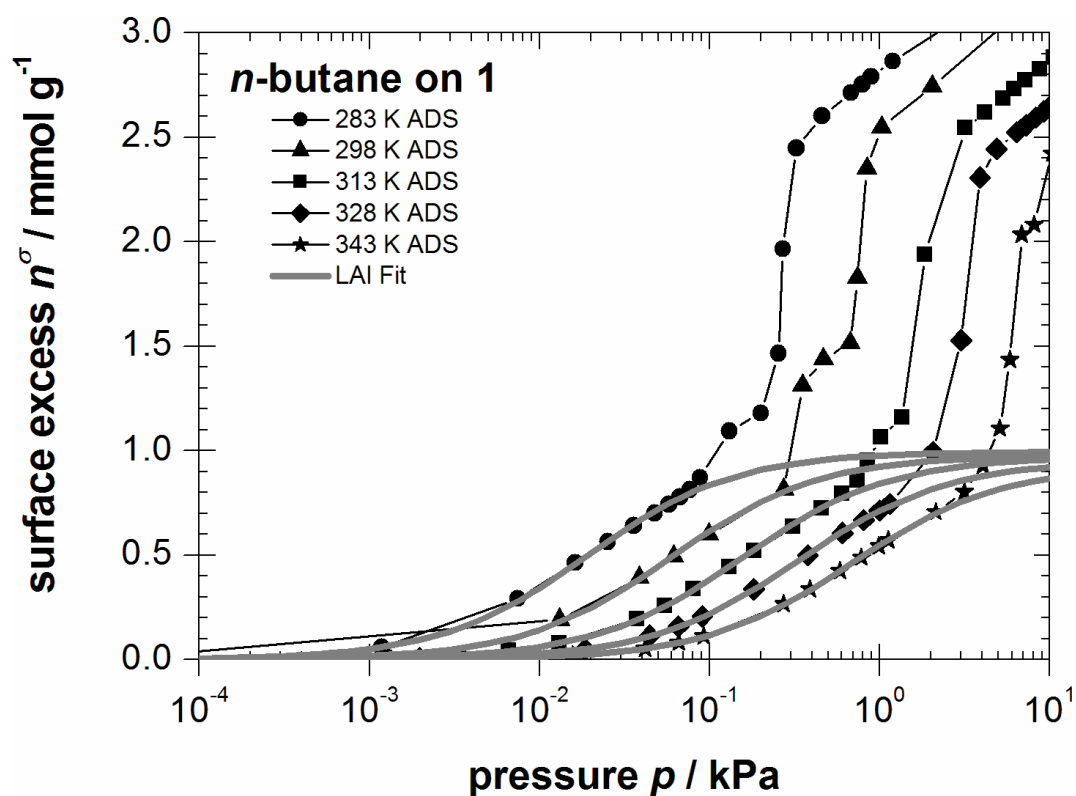

**Fig. SI 7** Adsorption isotherms of *n*-butane on **1** at 283 K (circles), 298 K (triangles), 313 K (squares), 328 K (diamonds) and 343 K (stars) with Langmuir-Fits (strong grey lines) for pore filling in low pressure region – black lines are to guide the eyes.

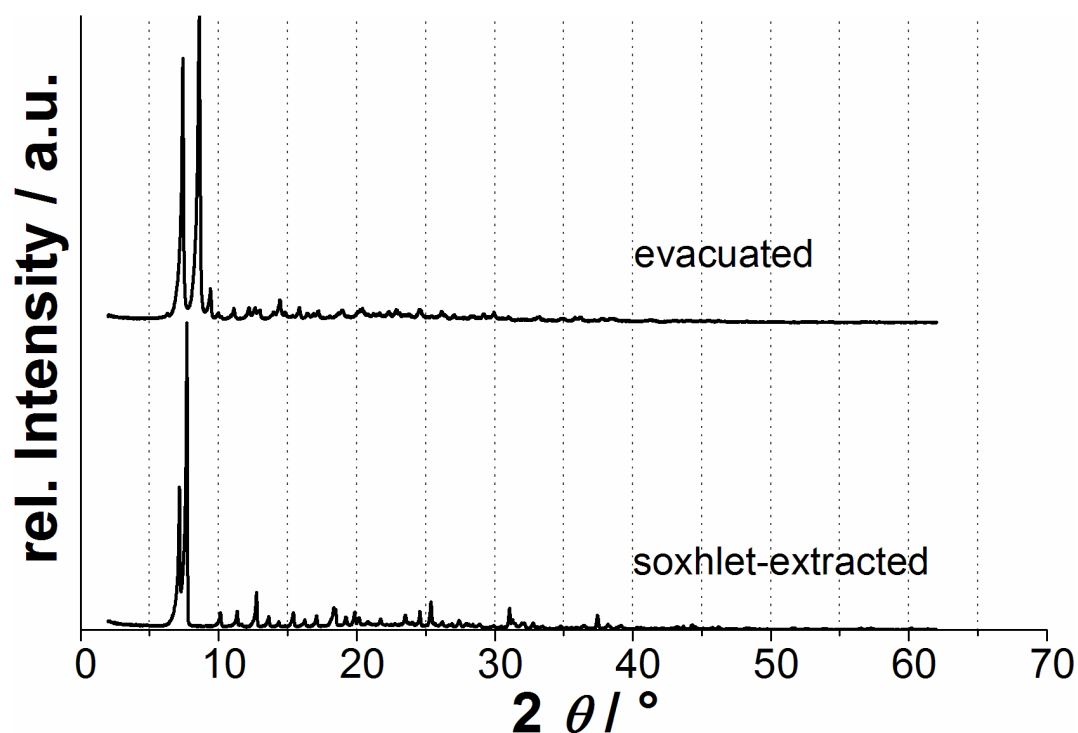

**Fig. SI 8** XRD pattern for **1** after Soxhlet extraction with MeOH (opened by solvent molecules) and under vacuum.

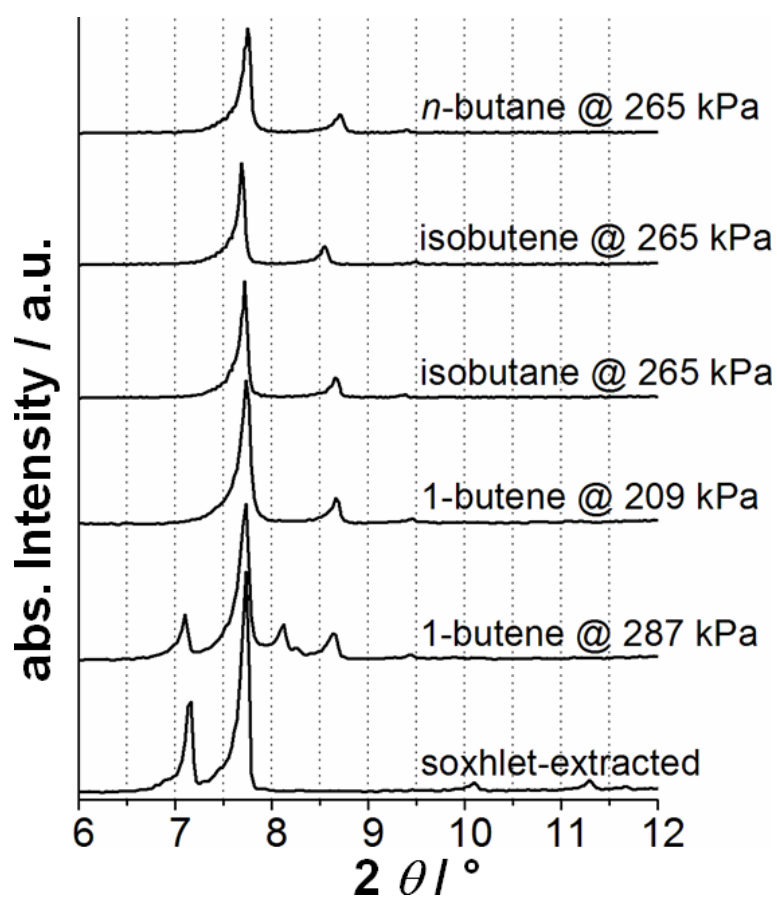

**Fig. SI 9** XRD patterns of **1** filled with solvent molecules (after MeOH Soxhlet extraction) and with different sorptives at 298 K and comparable pressures.

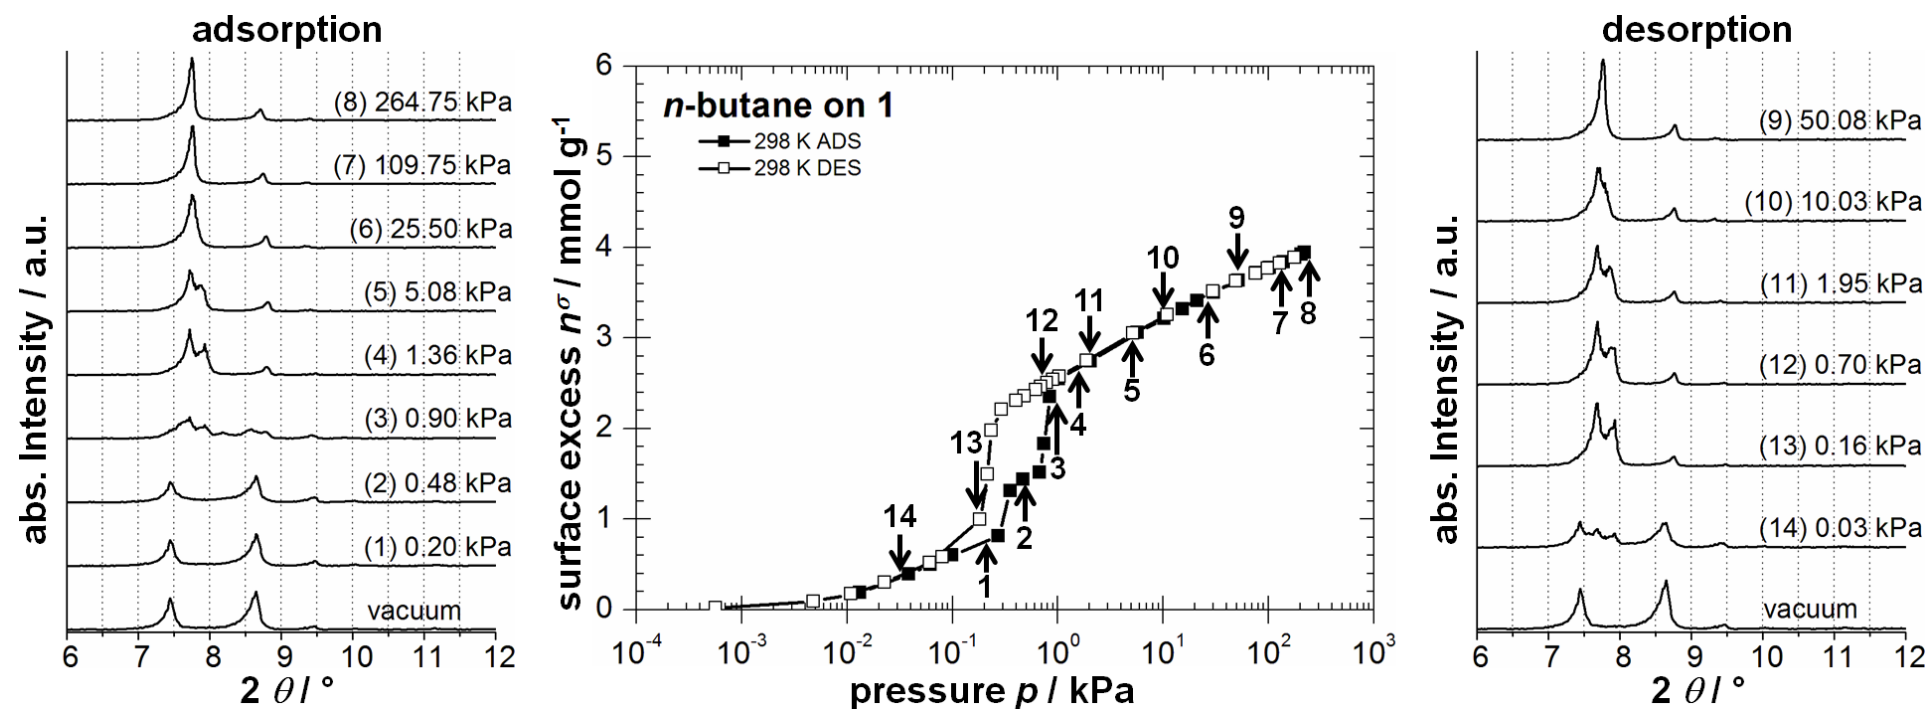

**Fig. SI 10** Adsorption (closed symbols) and desorption (open symbols) isotherm of  $n$ -butane on **1** (center) at 298 K and XRD patterns of **1** at different pressures for adsorption (left) and desorption (right). The respective points on the sorption isotherms at which the XRD patterns were recorded are labelled as 1 – 14. The gate-opening is observed at about 1 kPa (point 3).



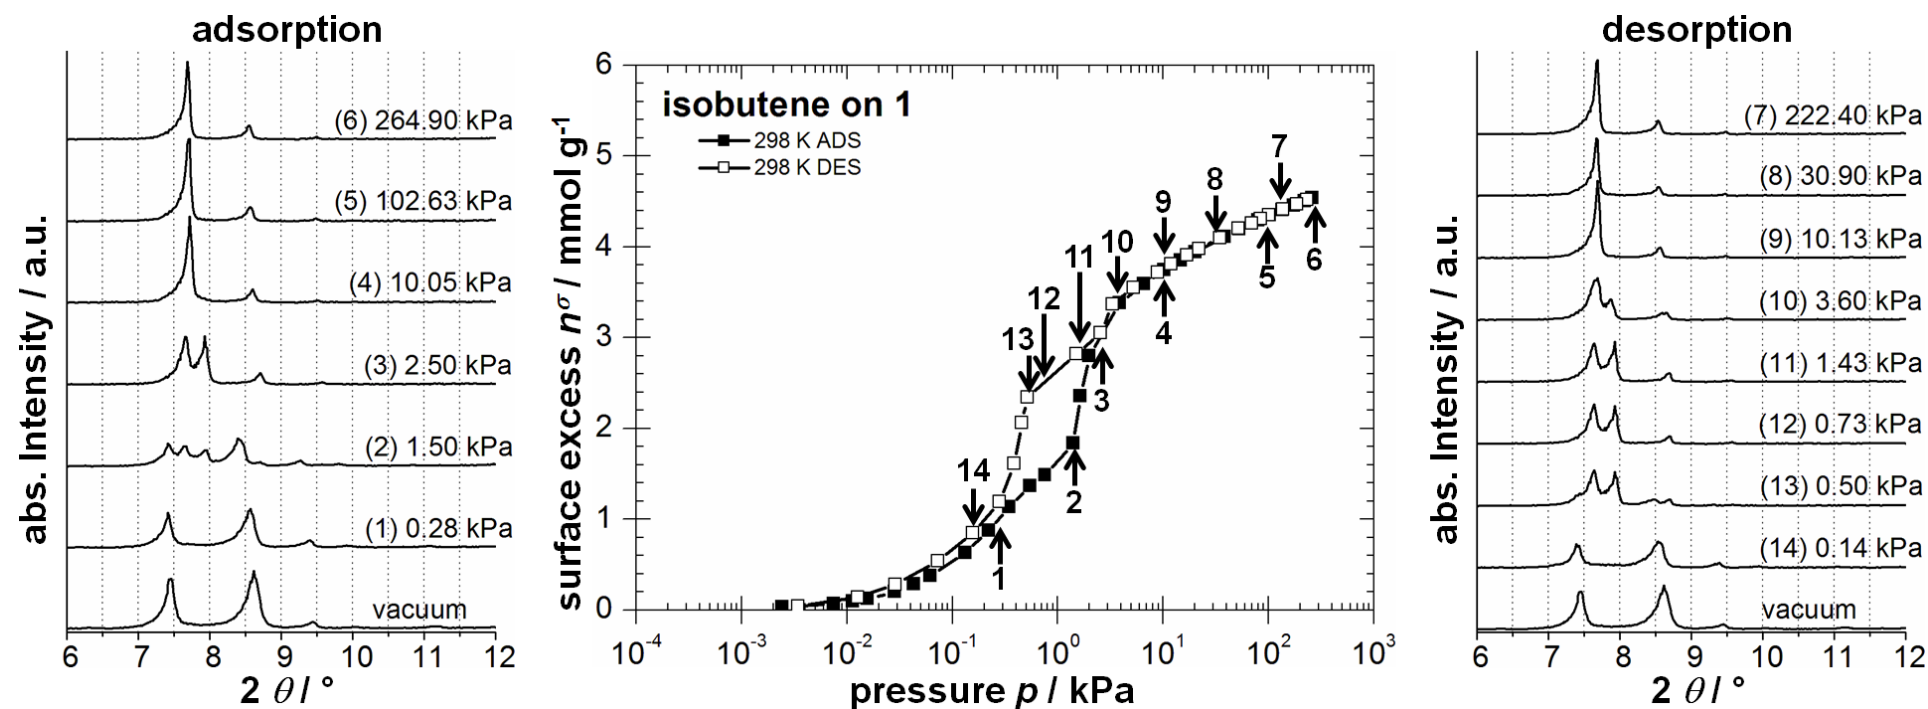

**Fig. SI 11** Adsorption (closed symbols) and desorption (open symbols) isotherm of isobutene on **1** (center) at 298 K and XRD patterns of **1** at different pressures for adsorption (left) and desorption (right). The respective points on the sorption isotherms at which the XRD patterns were recorded are labelled as 1 – 14. The gate-opening is observed at about 1.5 kPa (point 2).

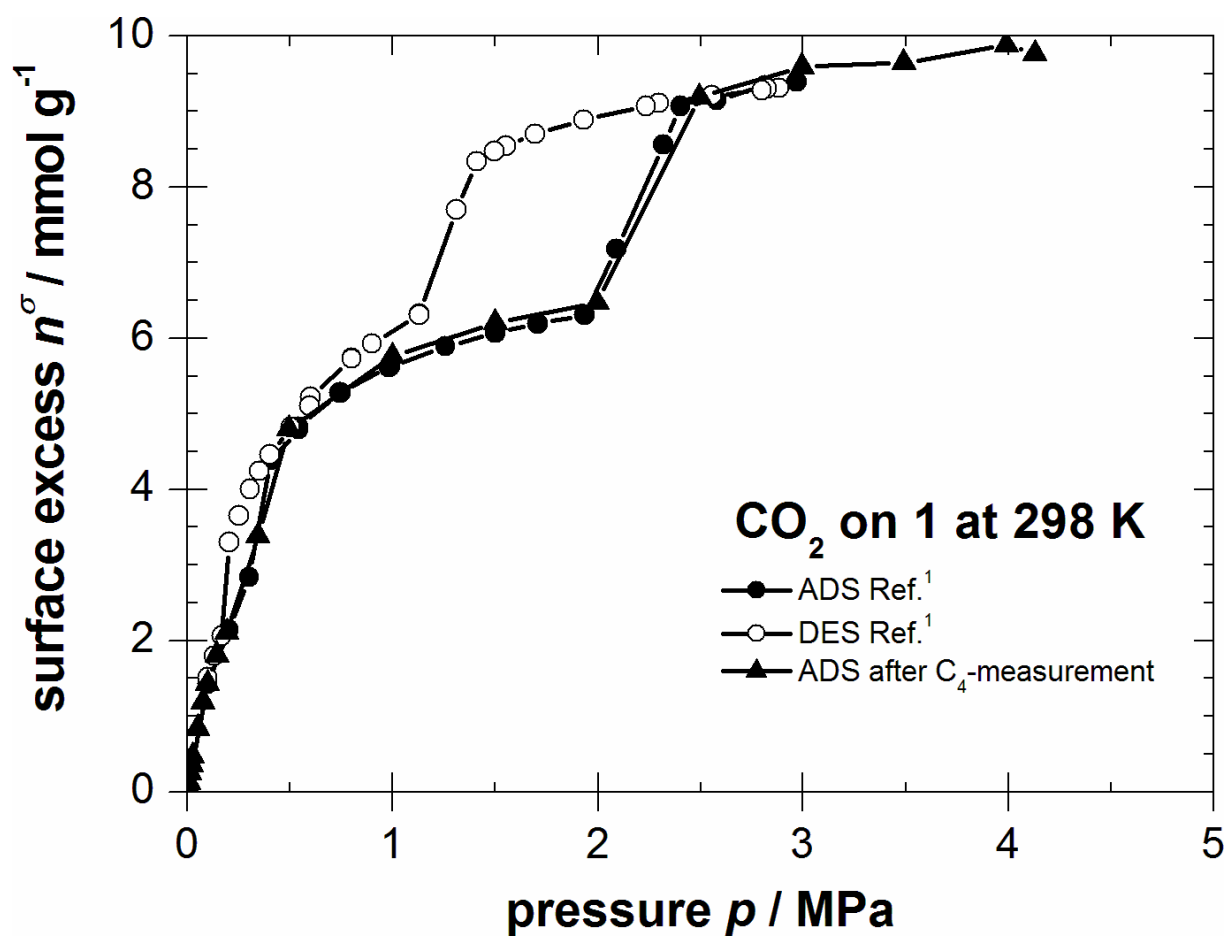

**Fig. SI 12** Adsorption and desorption isotherms of carbon dioxide on **1** at 298 K after C<sub>4</sub>-hydrocarbon sorption experiments compared to published data by Ref.<sup>1</sup>

#### References

- <sup>1</sup> J. Lincke, D. Lässig, J. Möllmer, C. Reichenbach, A. Puls, A. Möller, R. Gläser, G. Kalies, R. Staudt, H. Krautscheid, *Micropor. Mesopor. Mater.*, 2011, **142**, 62-69.
